# Supplementary material
Source: MDPI journal article supplement (https://www.mdpi.com/1424-2818/16/3/170)
Supplement: s1 [file s1]

Table S1. Geographical coordinates (degrees and decimal minutes) and altitude of the studied localities.

| Locality                | Island                         | Altitude<br>(m) | Latitude<br>(DDM) | Longitude<br>(DDM) |
|-------------------------|--------------------------------|-----------------|-------------------|--------------------|
| <b>São Miguel (SMG)</b> |                                |                 |                   |                    |
| Loc-1                   | Sete Cidades                   | ca 300 m        | 37° 51.54' N      | 25° 47.04' W       |
| Loc-2                   | Lagoa Verde                    | ca 300 m        | 37° 50.49' N      | 25° 47.16' W       |
| Loc-3                   | Lagoa Rasa                     | ca 800 m        | 37° 49.43' N      | 25° 45.12' W       |
| Loc-4                   | Lagoa do Caldeirao Sur         | ca 770 m        | 37° 44.74' N      | 25° 39.81' W       |
| Loc-5                   | Lagoa da Prata                 | ca 520 m        | 37° 48.39' N      | 25° 44.18' W       |
| Loc-6                   | Jardin Botanico Jose do Canto  | ca 60 m         | 37° 44.88' N      | 25° 40.23' W       |
| Loc-7                   | Universidade, Ponta Delgada    | ca 40 m         | 37° 44.74' N      | 25° 39.81' W       |
| Loc-8                   | Parque Urbano, Ponta delgada   | ca 80 m         | 37° 45.42' N      | 25° 39.56' W       |
|                         | Reserva Forestal do Pinhal da  |                 |                   |                    |
| Loc-9                   | Paz                            | ca 200 m        | 37° 47.17' N      | 25° 38.19' W       |
| Loc-10                  | Fenais da Luz                  | ca 60 m         | 37° 49.33' N      | 25° 37.26' W       |
| Loc-11                  | Lagoa do Fogo                  | ca 500 m        | 37° 46.21' N      | 25° 28.72' W       |
| Loc-12                  | Caldeiras da Ribeira Grande    | ca 200 m        | 37° 47.73' N      | 25° 29.68' W       |
| Loc-13                  | Gorreana                       | ca 220 m        | 37° 48.80' N      | 25° 23.86' W       |
| Loc-14                  | Lagoa de Sao Bras              | ca 600 m        | 37° 47.58' N      | 25° 24.76' W       |
| Loc-15                  | Lagoa de Areeiro               | ca 580 m        | 37° 45.75' N      | 25° 25.57' W       |
| Loc-16                  | Lagoa do Congro                | ca 700 m        | 37° 45.30' N      | 25° 24.50' W       |
| Loc-17                  | Xardin da Lagoa das Furnas     | ca 310 m        | 37° 44.95' N      | 25° 19.78' W       |
| Loc-18                  | Lomba da Maia                  | ca 150 m        | 37° 50.19' N      | 25° 21.10' W       |
| Loc-19                  | Salto do Cavalo                | ca 700 m        | 37° 47.23' N      | 25° 17.03' W       |
| Loc-20                  | Parque Terra Nostra            | ca 220 m        | 37° 46.27' N      | 25° 18.82' W       |
| Loc-21                  | Serra Devasa                   | ca 600 m        | 37° 47.98' N      | 25° 12.11' W       |
| Loc-22                  | Planalto dos Gramiñais         | ca 900 m        | 37° 48.03' N      | 25° 14.36' W       |
| Loc-23                  | Mata dos Bispos                | ca 550 m        | 37° 46.37' N      | 25° 11.91' W       |
| Loc-24                  | Pico da Vara                   | ca 800 m        | 37° 48.94' N      | 25° 13.84' W       |
| Loc-25                  | Nordeste                       | ca 150 m        | 37° 49.90' N      | 25° 8.77' W        |
| <b>São Jorge (SJG)</b>  |                                |                 |                   |                    |
| Loc-26                  | Faja da Caldeira de Sto Cristo | ca 200 m        | 36° 37.59' N      | 27° 56.29' W       |
| <b>Pico (PIC)</b>       |                                |                 |                   |                    |
| Loc-27                  | Lagoa do Peixinho              | ca 900 m        | 38° 26.07' N      | 28° 10.34' W       |
| <b>Terceira (TER)</b>   |                                |                 |                   |                    |
| Loc-28                  | Punta do Queimado              | ca 100 m        | 38° 45.91' N      | 27° 22.45' W       |
| Loc-29                  | Mata da Serreta                | ca 220 m        | 38° 46.30' N      | 27° 21.44' W       |
| Loc-30                  | Lagoa da Serreta               | ca 760 m        | 38° 44.96' N      | 27° 19.91' W       |
| Loc-31                  | Misterios Negros               | ca 600 m        | 38° 44.33' N      | 27° 16.81' W       |
| Loc-32                  | Biscoitos                      | ca 250 m        | 38° 46.81' N      | 27° 14.91' W       |

|                          |                   |          |              |              |
|--------------------------|-------------------|----------|--------------|--------------|
| Loc-33                   | Furnas do Enxofre | ca 600 m | 38° 43.77' N | 27° 13.88' W |
| <b>Graciosa (GRA)</b>    |                   |          |              |              |
| Loc-34                   | Praia             | ca 100 m | 39° 2.99' N  | 27° 58.86' W |
| Loc-35                   | Vitoria           | ca 70 m  | 39° 4.62' N  | 27° 3.67' W  |
| <b>Flores (FLO)</b>      |                   |          |              |              |
| Loc-36                   | Lajes das Flores  | ca 320 m | 39° 23.63' N | 31° 12.49' W |
| Loc-37                   | Faixa Grande      | ca 100 m | 39° 27.47' N | 31° 15.38' W |
| Loc-38                   | Caldeira Branca   | ca 520 m | 39° 26.81' N | 31° 13.51' W |
| Loc-39                   | Caldeira Funda    | ca 500 m | 39° 24.14' N | 31° 13.09' W |
| Loc-40                   | Morro Alto        | ca 750 m | 39° 28.28' N | 31° 12.51' W |
| <b>Santa Maria (STM)</b> |                   |          |              |              |
| Loc-41                   | Macela            | ca 100 m | 36° 57.25' N | 25° 6.21' W  |
| Loc-42                   | Praia Formosa     | ca 100 m | 36° 57.20' N | 25° 2.58' W  |
| Loc-43                   | Barreiro          | ca 200 m | 37° 0.59' N  | 25° 6.46' W  |
| Loc-44                   | Sao Lourenço      | ca 200 m | 36° 58.46' N | 25° 2.58' W  |
| Loc-45                   | Santo Espirito    | ca 300 m | 36° 57.32' N | 25° 2.16' W  |
| <b>Corvo (COR)</b>       |                   |          |              |              |
| Loc.46                   | Caldeirao         | ca 450 m | 39° 42.22' N | 31° 6.41' W  |
